# Supplementary material for: Early vertebrate whole genome duplications were predated by a period of intense genome rearrangement
Source: HighWire-hosted journal article supplement (doi:10.1101/gr.080119.108), 2008-07-14
Supplement: Hufton_Fig_S1.pdf [file Hufton_Fig_S1.pdf]

**Supplementary Fig. S1.** Coverage of the human genome by syntenic segments.

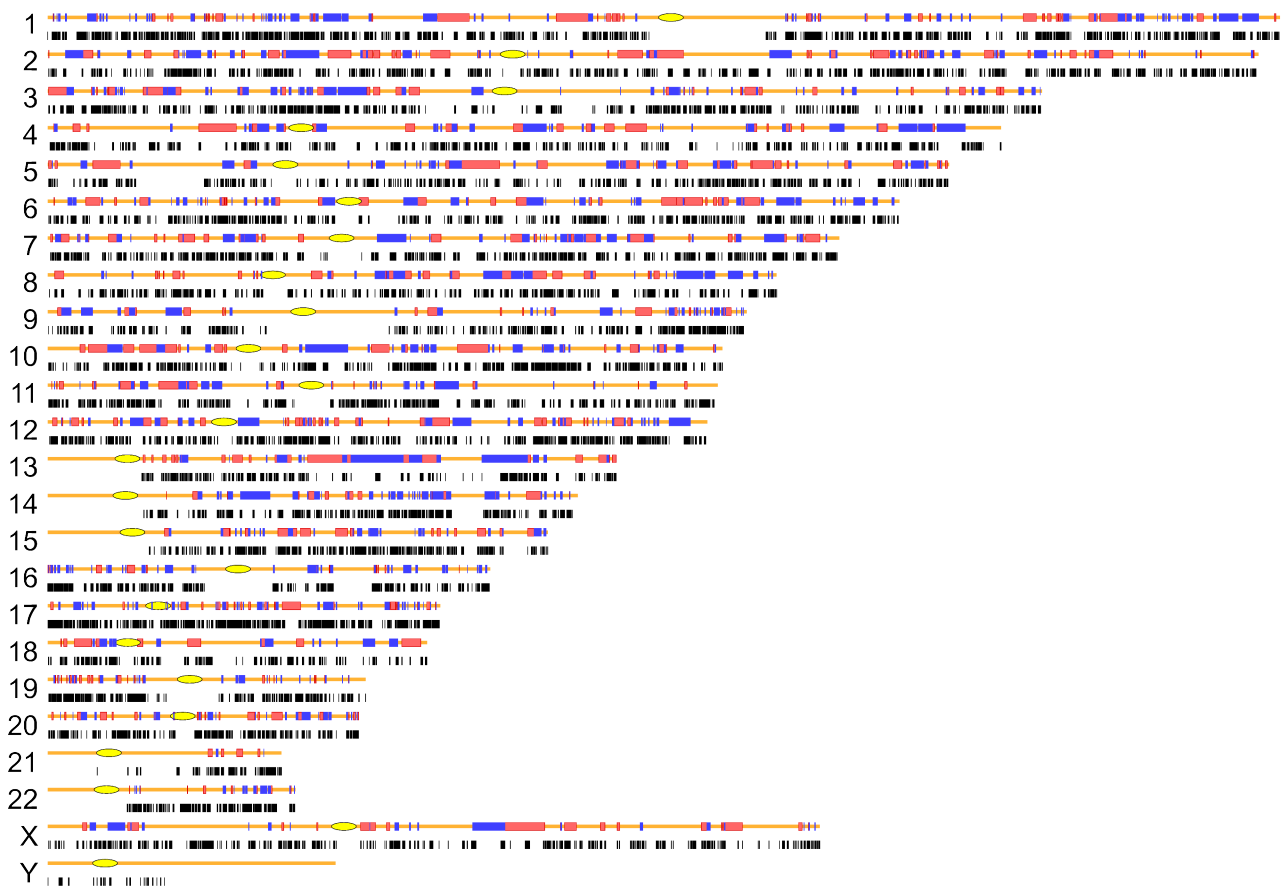

plot generated by gff2ps, available "<http://www1.imin.es/software/gfftools/GFF2PS.html>". Copyright 1999 by Joseph F. Abril & Roderic Guigo
