# Supplementary material for: Early vertebrate whole genome duplications were predated by a period of intense genome rearrangement
Source: HighWire-hosted journal article supplement (doi:10.1101/gr.080119.108), 2008-07-14

**Supplementary Fig. S2.** Friendly-Cohen plot of the human chromosomes vs. the largest amphioxus scaffolds.

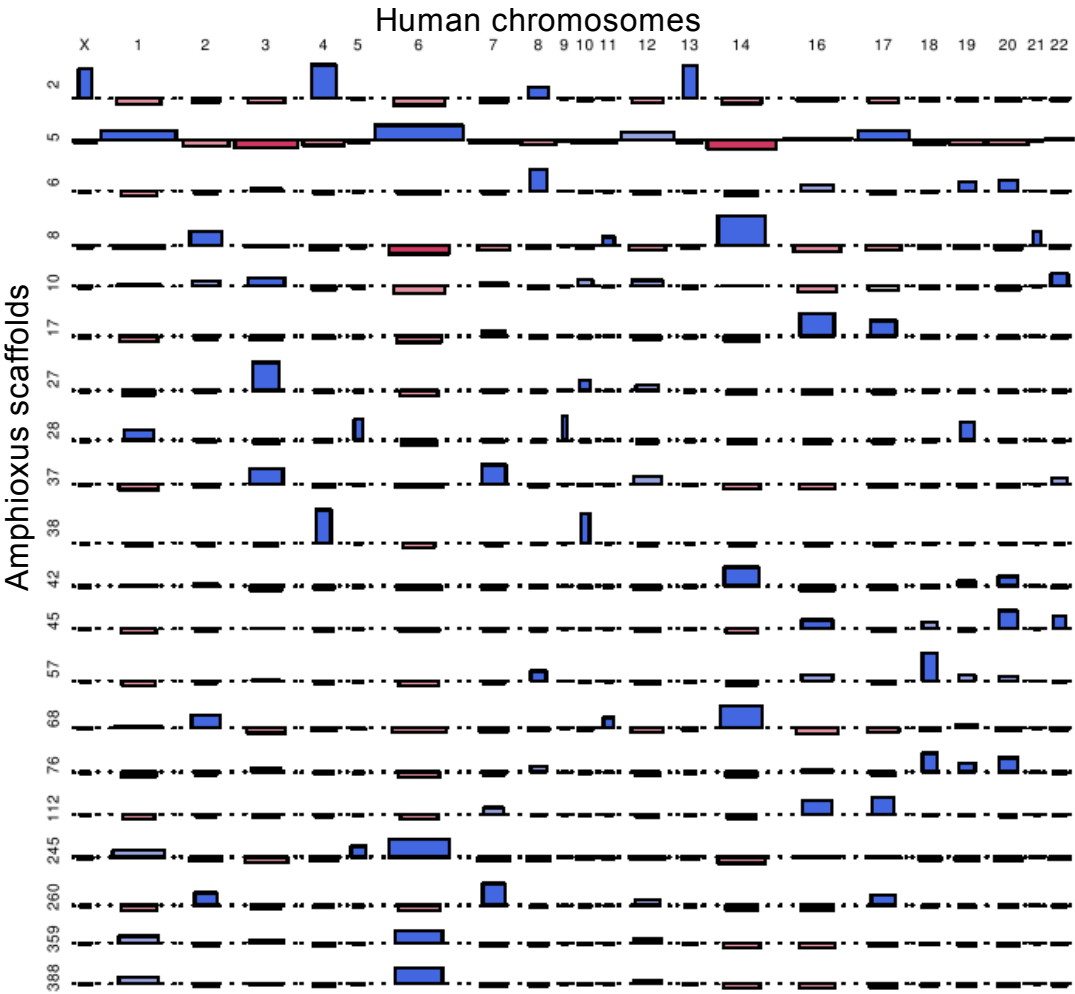

Supplement: Hufton_Fig_S2.pdf [file Hufton_Fig_S2.pdf]
